# Supplementary material for: Microbial production of sebacic acid from a renewable source: production, purification, and polymerization
Source: Royal Society of Chemistry journal article supplement (doi:10.1039/c9gc02274k), 2019-01-01
Supplement: c9gc02274k1.pdf [file c9gc02274k1.pdf]

*Electronic Supplementary Information*

**Microbial production of sebacic acid from a renewable source:  
production, purification, and polymerization**

Woo-Young Jeon,<sup>§a</sup> Min-Jeong Jang,<sup>§b</sup> Gyu-Yeon Park,<sup>§ab</sup> Hae-Jung Lee,<sup>a</sup> Sung-Hwa Seo,<sup>a</sup>  
Hee-Suk Lee,<sup>a</sup> Changpyo Han,<sup>a</sup> Heeun Kwon,<sup>a</sup> Ho-Chang Lee,<sup>c</sup> Jong-Hwa Lee,<sup>c</sup> Yong-Taek  
Hwang,<sup>d</sup> Myung-Ock Lee,<sup>d</sup> Jeong-Gyu Lee,<sup>e</sup> Hong-Weon Lee<sup>\*ab</sup> and Jung-Oh Ahn<sup>\*ab</sup>

<sup>a</sup>Biotechnology Process Engineering Centre, KRIBB, 30 Yeongudanji-ro, Ochang-eup,  
Cheongwon-gu, Cheongju-si, 363-883, Korea

<sup>b</sup>Bioprocess Department, University of Science and Technology, 217 Gajeong-ro Yuseong-  
gu, Daejeon, Korea

<sup>c</sup>Aekyung Petrochemical Co., Ltd, 120, Sinseongnam-ro, Yuseong-gu, Daejeon, Korea

<sup>d</sup>Lotte Chemical, 115 Gajeongbuk-ro, Yuseong-gu, Daejeon, 34110, Korea

<sup>e</sup>SmallLab Co., Ltd, Techno Jungang-ro, Yuseong-gu, Deajeon, 243-15, Korea

<sup>§</sup>These authors equally contributed to this study.

\*Co-corresponding authors:

Hong-Weon Lee (hwlee@kribb.re.kr)

Jung-Oh Ahn (ahnjo@kribb.re.kr)

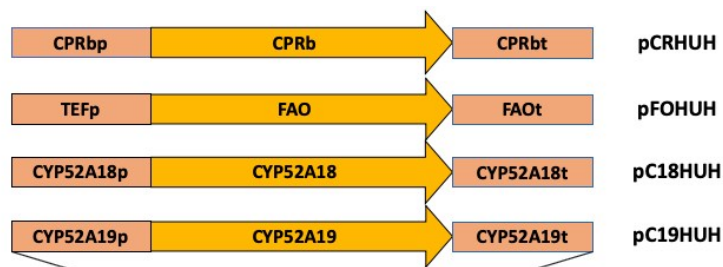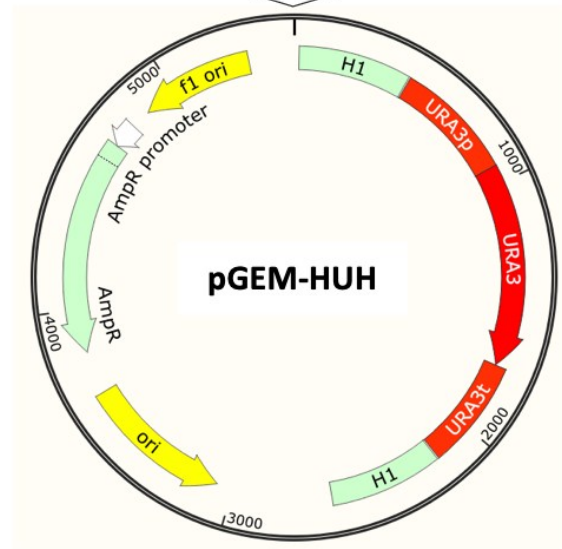

**Supplementary Fig. S1 The plasmid maps for expression cassette constructed in this study.** pGEM-HUH was constructed by inserting the *URA3* and two identical *hisG* DNA sequences. Four plasmids (pCRHUH, pFOHUH, pC18HUH, and pC19HUH) were constructed by inserting each target gene (CPRB, FAO, CYP52A18, and CYP52A19). F1 ori : f1 bacteriophage origin of replication; arrow indicates direction of (+) strand synthesis. AmpR : ampicillin resistant gene. Ori: high-copy-number ColE/pMB1/pBR322/pUC origin of replication. CPRbp : CPRb promoter, TEFp : TEF promoter, CYP52A18p: CYP52A18 promoter, CYP52A19p : CYP52A19 promoter, URA3p : URA3 promoter, CPRbt : CPRb terminator, FAOt : FAO terminator, CYP52A18t : CYP52A18 terminator, CYP52A19t : CYP52A19 terminator, URA3t : URA3 terminator

**Supplementary Table S1.** Comparison of the amino acid composition between the impurities and yeast extract.

| <b>Amino acid</b> | <b>Impurities composition<br/>(g/100 g)</b> | <b>Yeast extract composition<br/>(g/100 g)</b> |
|-------------------|---------------------------------------------|------------------------------------------------|
| Aspartate         | 6.15                                        | 6.00                                           |
| Threonine         | 2.40                                        | 2.60                                           |
| Serine            | 2.49                                        | 2.70                                           |
| Glutamate         | 6.21                                        | 11.00                                          |
| Proline           | 1.89                                        | 2.2                                            |
| Glycine           | 2.11                                        | 2.5                                            |
| Alanine           | 3.02                                        | 4.10                                           |
| Valine            | 2.75                                        | 3.10                                           |
| Isoleucine        | 2.39                                        | 2.60                                           |
| Leucine           | 4.49                                        | 2.33                                           |
| Phenylalanine     | 1.69                                        | 2.50                                           |
| Tyrosine          | 2.87                                        | 0.80                                           |
| Lysine            | 2.00                                        | 4.20                                           |
| Histidine         | 0.69                                        | 1.10                                           |
| Arginine          | 0.92                                        | 2.80                                           |

The amino acid composition of solid impurities was similar to that of yeast extract.

**Supplementary Table S2.** Composition of solid impurities.

| <b>Component</b> | <b>Composition (%)</b> |
|------------------|------------------------|
| Metal            | 10.6                   |
| Amino acid       | 42.1                   |
| Other            | 47.3                   |
| Total            | 100                    |
